# Supplementary material
Source: HighWire-hosted journal article supplement (https://jnm.snmjournals.org/highwire/filestream/95335/field_highwire_adjunct_files/0/203315_Supplemental_Data.pdf)
Supplement: 203315_Supplemental_Data.pdf [file 203315_Supplemental_Data.pdf]

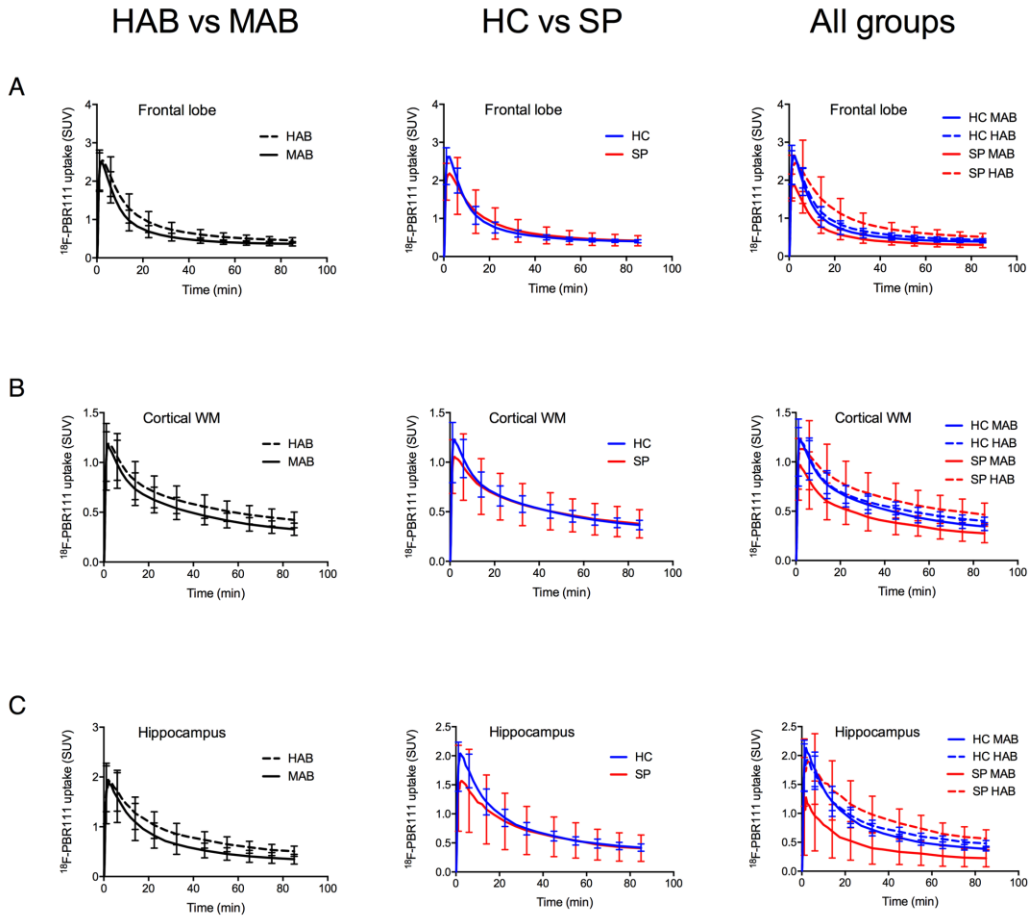

**SUPPLEMENTAL FIGURE 1.** Averaged ( $\pm$  SD) time-activity curves in the frontal lobe (A), cortical WM (B) and hippocampus (C) across clinical groups.

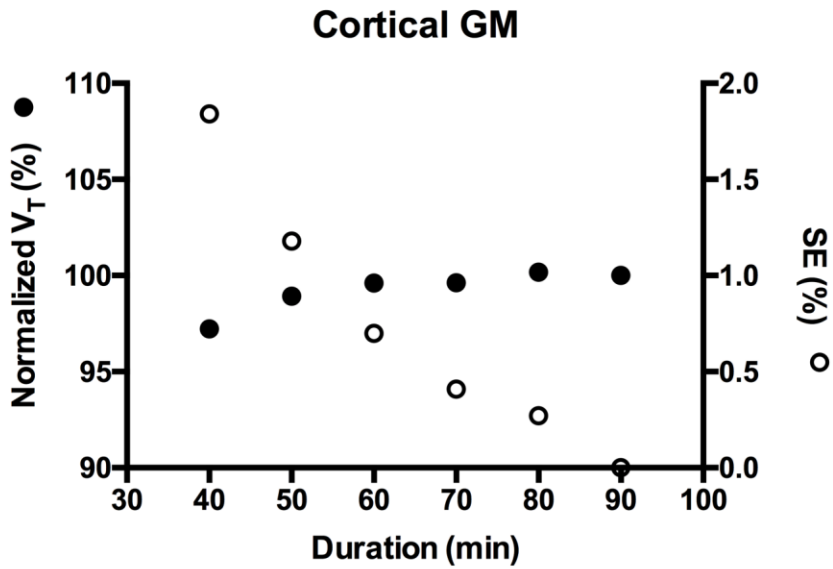

**SUPPLEMENTAL FIGURE 2.** Average normalized total volume of distribution (i.e.,  $V_T/V_{T-90min}$ ;  $n = 10$ ) and standard error (SE) in cortical GM as function of acquisition duration using 90min min as the terminal point. Scans were analysed using data from time 0 to specified time on the x-axis. Normalized  $V_T$  (●) is plotted on the left y-axis, SE (○) is plotted on the right y-axis.

**SUPPLEMENTAL TABLE 1.** Pearson's correlation coefficient between  $V_T$  from 2TCM and 2TCM-1K.

| Brain region         | HC     | SP     |
|----------------------|--------|--------|
| <b>Cortical GM</b>   | 0.81 * | 0.82 ‡ |
| <b>Cortical WM</b>   | 0.60 † | 0.75 ‡ |
| <b>Thalamus</b>      | 0.86 * | 0.84 ‡ |
| <b>Basal ganglia</b> | 0.82 * | 0.93 * |
| <b>Hippocampus</b>   | 0.86 * | 0.84 ‡ |
| <b>Cerebellum</b>    | 0.78 * | 0.82 ‡ |
| <b>Brainstem</b>     | 0.71 * | 0.88 † |

Symbols denote significant correlations (\*  $p < 0.0001$ , †  $p < 0.001$ , ‡  $p < 0.01$ ).
